# Supplementary material for: Self-assembly of octachloroperylene diimide into 1D rods and 2D plates by manipulating the growth kinetics for waveguide applications
Source: Royal Society of Chemistry journal article supplement (doi:10.1039/c3cc49343a), 2014-01-01
Supplement: c3cc49343a1.pdf [file c3cc49343a1.pdf]

Electronic supplementary information (ESI) for:

Self-assembly of Octachloroperylene diimide into 1D  
Rods and 2D Plates by Manipulating the Growth  
Kinetics for Waveguide Applications

*Huiying Liu<sup>a,b</sup>, Xinqiang Cao<sup>a,b</sup>, Yishi Wu<sup>a\*</sup>, Qing Liao<sup>a</sup>, Ángel J. Jiménez,<sup>c</sup> Frank Würthner<sup>c\*</sup>, and  
Hongbing Fu<sup>a\*</sup>*

<sup>a</sup>Beijing National Laboratory for Molecular Sciences (BNLMS), Institute of Chemistry, Chinese Academy of Sciences, Beijing 100190, P.R. China.

Fax: +86-10-82616517; Tel: +86-10-62526801

\*E-mail: hongbing.fu@iccas.ac.cn

<sup>b</sup>Graduate University of Chinese Academy of Sciences (GUCAS), Beijing 100049, P.R. China

<sup>c</sup> Universität Würzburg, Institut für Organische Chemie and Röntgen Research Center for Complex Material Systems, Am Hubland, 97074 Würzburg (Germany)

Fax: +49 931-3184756; Tel: +49-931-3185340

\*E-mail: wuerthner@chemie.uni-wuerzburg.de

# Contents

1. Materials and experimental details
  - 1) Preparation of the Cl<sub>8</sub>-PTCDI 1D rods and 2D plates
  - 2) Structure characterization
  - 3) Calculation using Materials Studio
2. Fig. S1 Scanning electron microscopy (SEM) images of the 1D rods and 2D plates of Octachloroperylene diimide (Cl<sub>8</sub>-PTCDI)
3. Fig. S2 Atomic force microscopy (AFM) image and corresponding cross section profiles of 1D rod and 2D plate
4. Fig. S3 SEM images of the transformation of 1D rods to the leaf-like 2D plates
5. Fig. S4 Schematic demonstration of the experimental setup for the optical characterization
6. Fig. S5 UV-Vis absorption and PL emission spectra of Cl<sub>8</sub>-PTCDI solution and microcrystals
7. Fig. S6 Dark-field PL images for single crystals by near-field scanning optical microscopy (NSOM)

## 1. Materials and experimental details

### 1) Preparation of the Cl<sub>8</sub>-PTCDI 1D rods and 2D plates

The molecule OCPDI was synthesized and purified as previously described.<sup>1</sup> The 1D rods and 2D plates of Cl<sub>8</sub>-PTCDI were prepared via a liquid phase self-assembly method. In a typical preparation, 200 μL of 10 mM Cl<sub>8</sub>-PTCDI solution in good solvent of dimethyl formamide (DMF) was injected rapidly into 1 mL (3 mL) of methanol as poor solvent, under vigorous sonication. The turbulent mixing of DMF and methanol changes the solubility of the molecule and solvent polarity, inducing the self-assembly of Cl<sub>8</sub>-PTCDI molecules. After cooling and aging in closed tubes at room temperature for one hour (ten hours), 1D rods (2D plates) with uniform dimensions were obtained and dispersed in the colloid solutions. The colloid solution was then used to prepare samples for further characterizations by drop-casting onto silicon wafers, copper grids and glass slides.

### 2) Structure characterization

The morphologies of Cl<sub>8</sub>-PTCDI microcrystals were characterized by field-emission scanning electron microscope (HITACHI S-4800) operated at an acceleration voltage of 15 kV. A thin layer of Pt was deposited onto the samples before SEM examination. Cl<sub>8</sub>-PTCDI microcrystals casted on copper grid were observed on a JEOL TEM-1011 transmission electron microscope with an accelerating voltage of 100 kV. AFM images and cross section profiles were taken on a Veeco Nanoscope IIIa atom force microscopy. X-ray diffraction patterns were obtained by measuring samples filtered on 20nm AAO membrane (Whatman, Inc.) using Bruker D8 Focus X-ray powder diffraction photometer. The steady-state absorption spectra were measured on a Perkin-Elmer Lambda 35 spectrometer with a scanning speed of 240 nm /min and a slit width of 1 nm. The stationary fluorescence spectra were recorded on a Hitachi F-4500 fluorescence spectrophotometer using a right angle configuration. Slits were set to provide widths of 5 nm for both the excitation and the emission monochromators. Cuvettes with a 1 cm path length were used. All spectroscopic measurements were carried out at room temperature.

### 3) Calculation using Materials Studio

The growth morphologies of Cl<sub>8</sub>-PTCDI were calculated by using the Materials Studio software, based on the attachment energy theory<sup>2</sup>. The molecule structure is firstly optimized based on the experimental crystal structure using the Discover module. The geometric and energy calculation were performed using the Forcite and Morphology modules of the Material Studio software<sup>3</sup>. The predicted equilibrium and growth morphologies were shown in Fig. 4 in the manuscript. Moreover, the surface free energies  $\gamma_{\{hkl\}}$  and attachment energies of low-index faces have been also calculated as shown in Table 1.

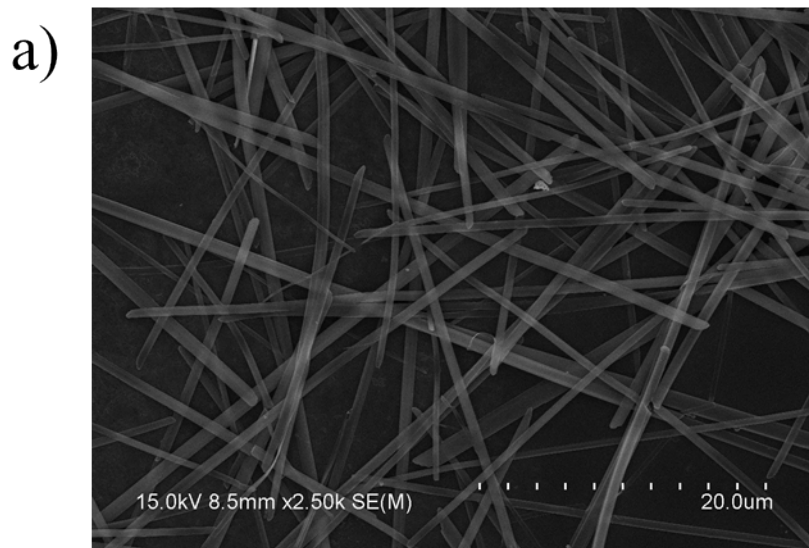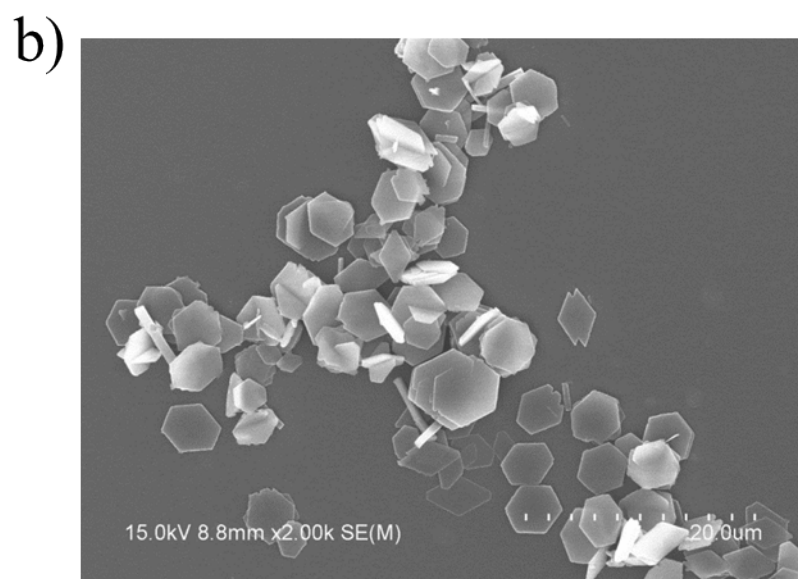

**Fig S1.** SEM image of Cl<sub>8</sub>-PTCDI 1D rods and 2D plates obtained via solution self-assembly.

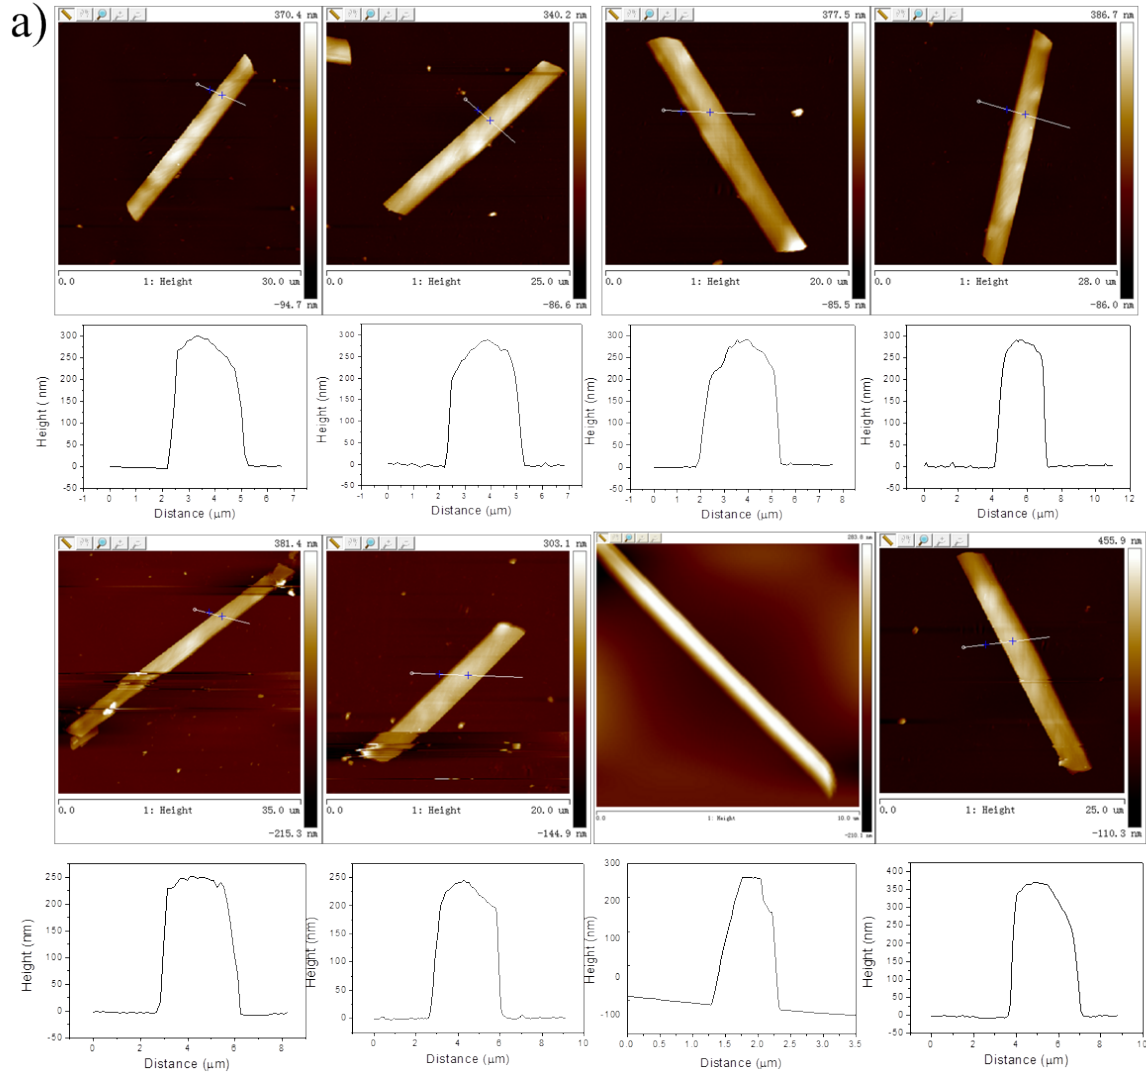

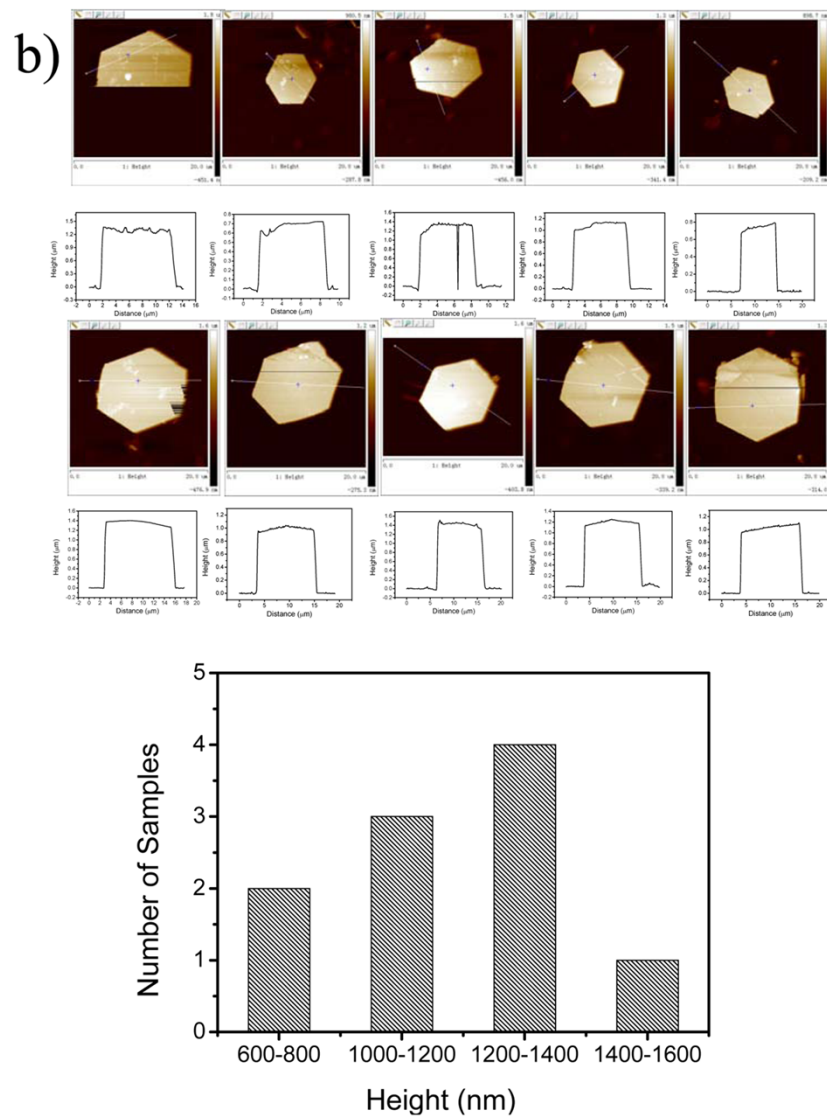

**Fig. S2** Atomic force microscopy (AFM) images of a) 1D rods of Cl<sub>8</sub>-PTCDI and corresponding cross section profiles with height of  $300 \pm 80$  nm and b) AFM images of 2D plates and the thickness of 2D plate ranges 0.6 to 1.5  $\mu$ m.

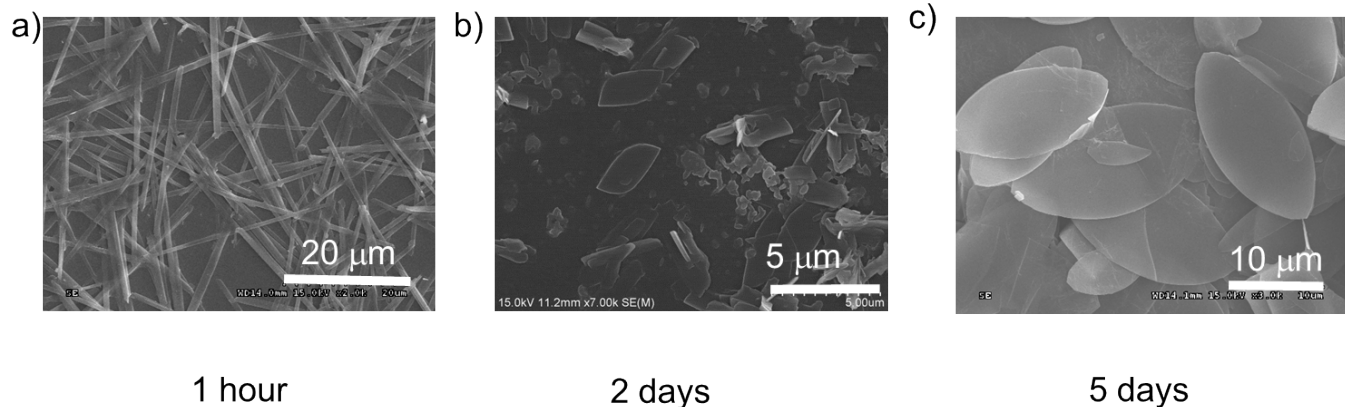

**Fig. S3** The morphology evolution of 1D rods to the leaf-like 2D plates after different growth time: a) 1 h; b) 2 days; c) 5 days. Scale bars are labeled in the images.



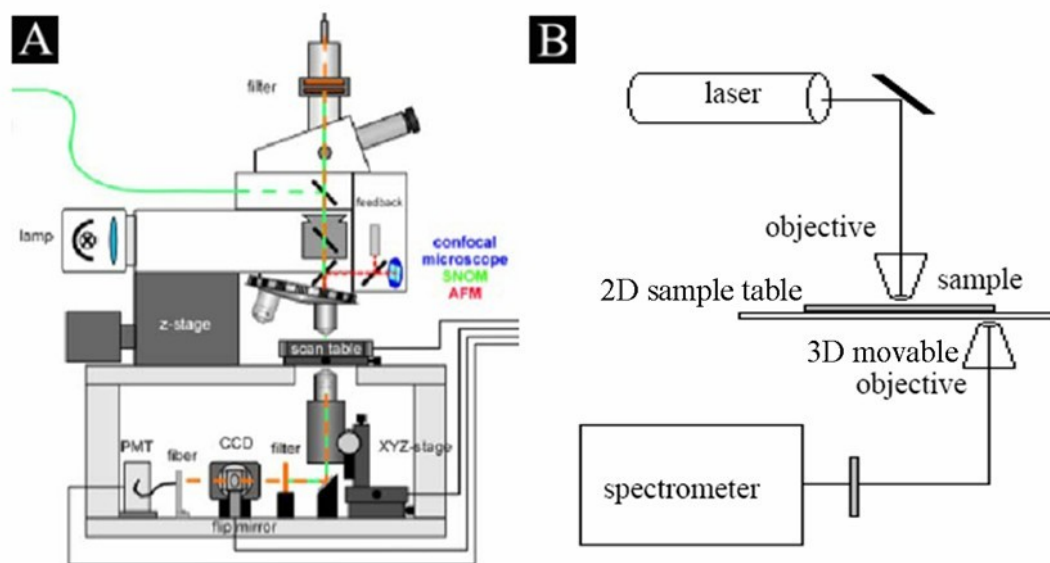

**Fig. S4** Schematic demonstration of the experimental setup for the optical characterization

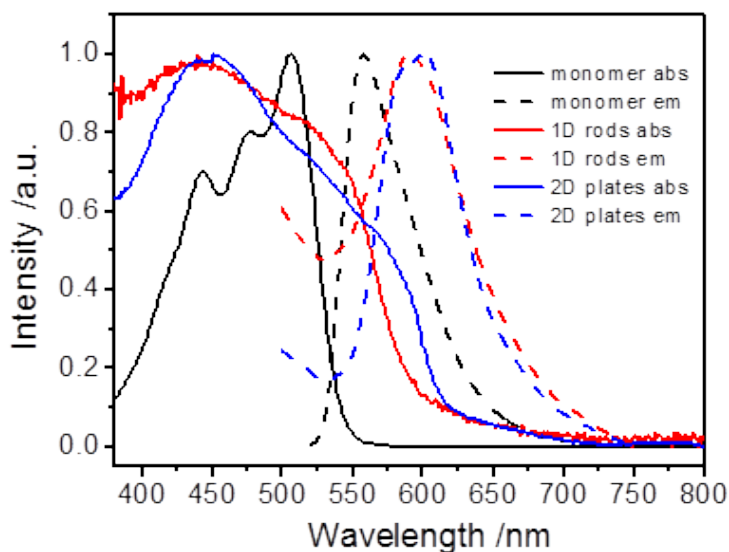

**Fig. S5** Normalized steady-state UV-Vis absorption spectra (solid line) and fluorescence emission spectra (dash line) of  $\text{Cl}_8$ -PTCDI solution in THF (black), 1D rods (red) and 2D plates (blue). The absorption and PL spectra of 1D rods and 2D plates undergoes a red-shift compared to the solution, which results in a large spectral overlap between the absorption and PL spectra.

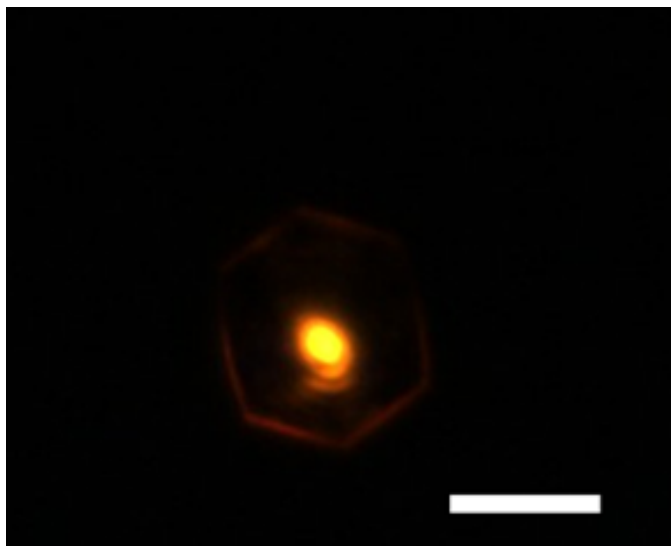

**Fig. S6** Dark-field PL image for single crystals by NSOM, with white scale bar of 10  $\mu\text{m}$ . The excitation wavelength of laser was set at 471 nm.

## References

- 1 M. Gsänger, J. H. Oh, M. Könemann, H. W. Höffken, A.-M. Krause, Z. Bao and F. Würthner, *Angew. Chem. Int. Ed.*, 2010, 49, 740-743.
- 2 (a) Berkovitch-Yellin, *Z. J. Am. Chem. Soc.*, 1985, 107, 8239-8253. (b) Fiorrentini, V., Methfessel, M. *J. Phys., Condens. Matter.*, 1996, 8, 6525-6529. (c) Sunagawa, I. *Crystals: Growth, Morphology and Perfection*; Cambridge University Press: Cambridge, 2005.
- 3 (a) S. X. M. Boerrigter, H. M. Cuppen, R. I. Ristic, J. N. Sherwood, P. Bennema and H. Meekes, *Cryst. Growth. Des.*, 2002, 2, 357-361; (b) L. Kang, H. Fu, X. Cao, Q. Shi and J. Yao, *J. Am. Chem. Soc.*, 2011, 133, 1895-1901.
